# Supplementary material for: Molecular bases for differential aging programs between flag and second leaves during grain-filling in rice
Source: PubMed Central journal article supplement (PMC5562787; doi:10.1038/s41598-017-07035-9), 2017-08-18
Supplement: 41598_2017_7035_MOESM1_ESM.pdf [file 41598_2017_7035_MOESM1_ESM.pdf]

# Molecular bases for differential aging programs between flag and second leaves during grain-filling in rice

Shinyoung Lee<sup>1,#</sup>, Hyobin Jeong<sup>1,#</sup>, Sichul Lee<sup>1</sup>, Jinwon Lee<sup>1</sup>, Sun-Ji Kim<sup>1</sup>, Ji-Won Park<sup>1</sup>, Hye Ryun Woo<sup>2</sup>, Pyung Ok Lim<sup>2</sup>, Gynheung An<sup>3</sup>, Hong Gil Nam<sup>1,2,\*</sup>, and Daehee Hwang<sup>1,2,\*</sup>

<sup>1</sup>Center for Plant Ageing Research, IBS, Daegu Gyeongbuk Institute of Science and Technology, Daegu 711-873, Republic of Korea; <sup>2</sup>Department of New Biology, Daegu Gyeongbuk Institute of Science and Technology, Daegu 711-873, Republic of Korea; and <sup>3</sup>Department of Plant Molecular Systems Biotechnology and Crop Biotech Institute, Kyung Hee University, Yongin 446-701, Republic of Korea.

This file includes:

Supplementary Methods

Supplementary Figures 1-7

Supplementary Tables 1-6

– Tables 1-4 are provided in additional Excel spreadsheets.

Supplementary References

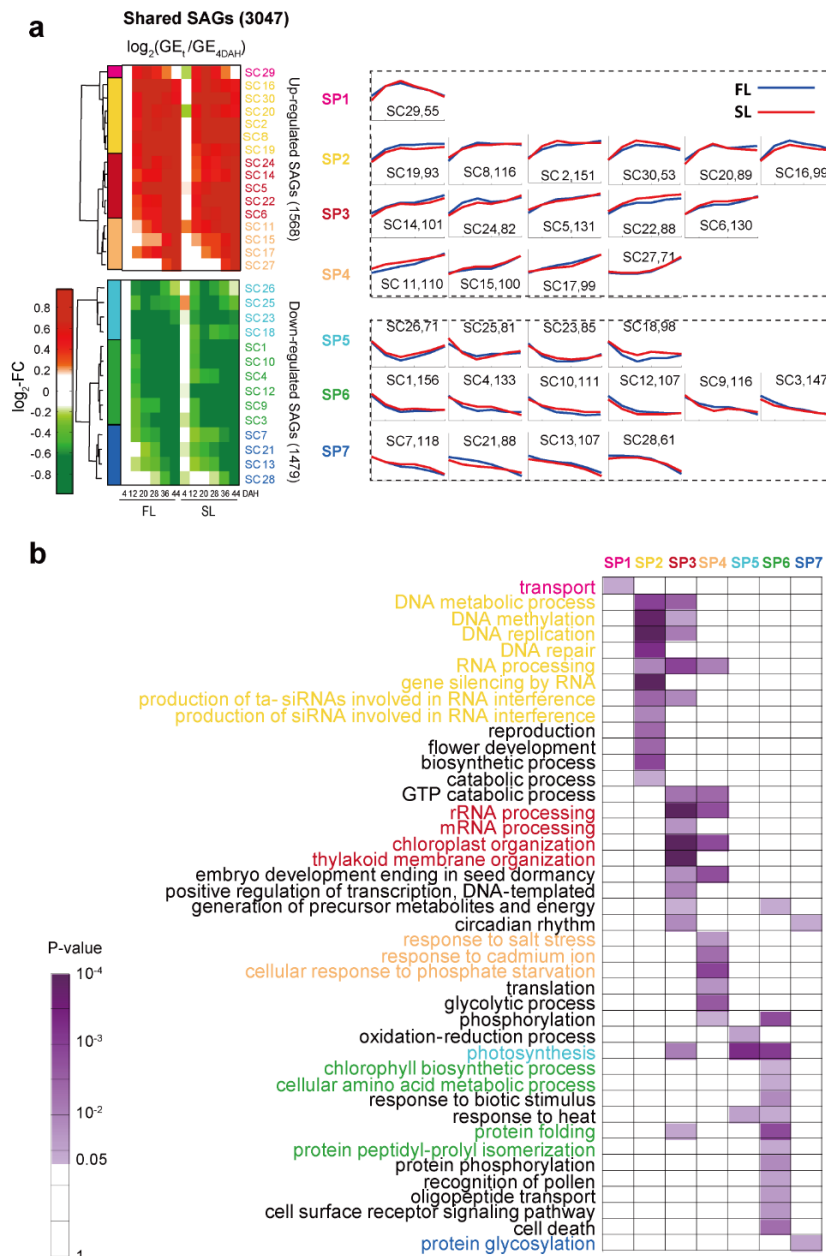

**Supplementary Fig. 1. Shared senescence-associated genes (SAGs) between flag leaves (FL) and second leaves (SL).** (a) Shared temporal gene expression (GE) patterns of Shared\_SAGs between FL and SL. The 3,047 Shared\_SAGs were clustered into 30 clusters (SC1-30; Methods). For each cluster, the heat map shows mean  $\log_2$ -FCs [ $\log_2(GE_t/GE_{4DAH})$ ] of the resident genes at each time point ( $t$ ), compared with that at 4 DAH. Colors represent up-regulation (red;  $\log_2$ -FC  $\geq 0$ ) and down-regulation (green;  $\log_2$ -FC  $< 0$ ) during grain-filling, compared with that at 4 DAH in FL and SL. SC1-30 were then grouped into seven patterns (SP1-7) based on similarities of temporal expression patterns in individual clusters. Blue and red lines represent mean  $\log_2$ -FC profiles during grain filling in FL and SL, respectively. (b) Gene ontology biological processes (GOBPs) that were significantly ( $P < 0.05$ ) represented by the Shared\_SAGs in SP1-7. Key GOBPs enriched by SP1-7 are highlighted in different colors. The color bar shows gradient of  $\log_{10}(P)$  values, where  $P$  is the enrichment  $P$ -value obtained from DAVID software.

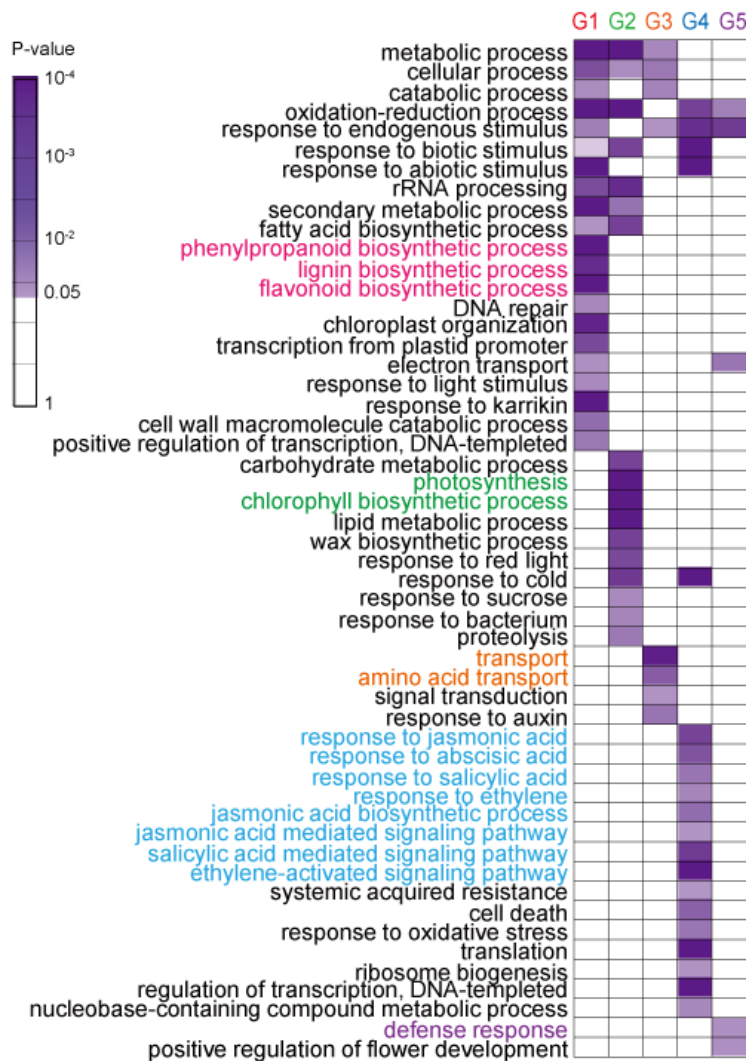

**Supplementary Fig. 2. GOBPs represented by Diff\_SAGs in G1-5.** Key GOBPs that were enriched by G1-5 are highlighted in different colors. The color bar shows the gradient of  $\log_{10}(P)$  values, where P is the enrichment P-value from DAVID software.

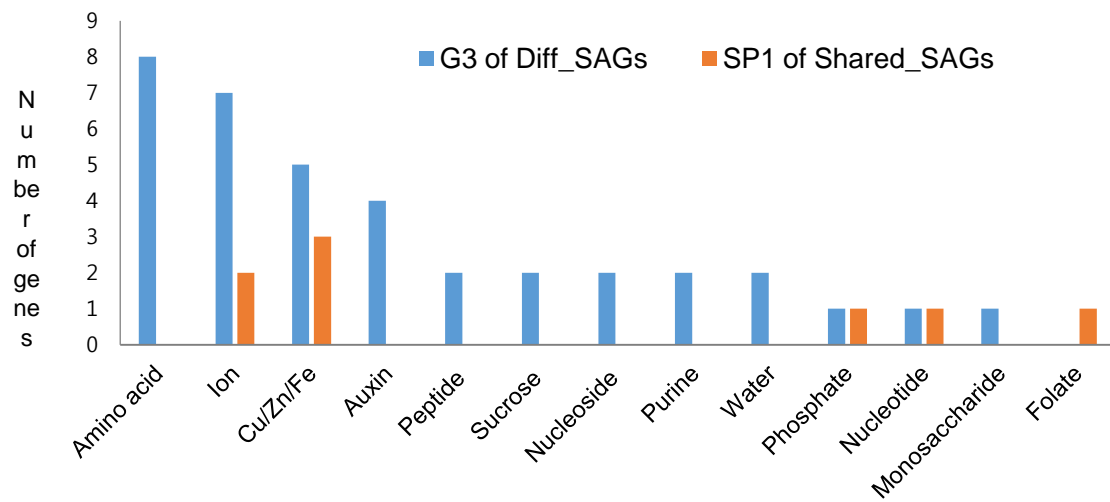

**Supplementary Fig. 3. Numbers of transporters in G3 and SP1.** A total of 13 types of transporters were included in G3 and SP1. Numbers of transporter types in G3 (blue) and SP1 (orange) are shown.

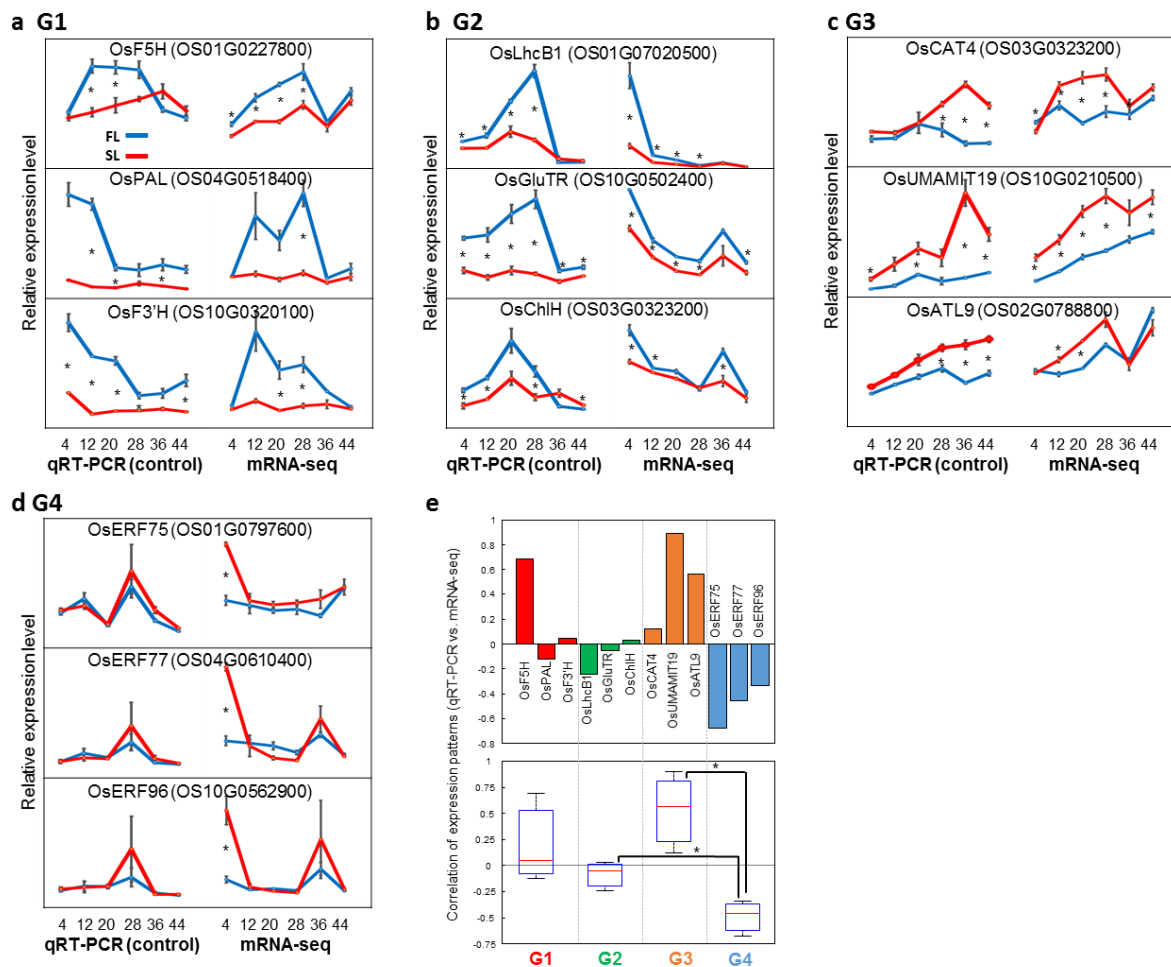

**Supplementary Fig. 4. Comparison of temporal expression profiles in FL and SL from mRNA-sequencing and qRT-PCR analyses of independent samples.** (a-e) qRT-PCR analyses of independent samples ( $n = 3$ ) were performed for denoted representative genes of G1-4 (a-d, “qRT-PCR” panel, respectively). Expression levels of representative genes were normalized to those of actin at the corresponding time point. Blue and red lines represent temporal gene expression profiles in FL and SL, respectively. Read counts of representative genes from mRNA-sequencing are presented in the same manner (a-d, “mRNA-seq” panel). Data are presented as means  $\pm$  SEM from three biological replicates. (e) Correlations of differential expression patterns of representative genes between FL and SL (top panel). Boxplots of gene correlations in each group are shown (bottom panel). \* $P < 0.05$ , two-tailed t-test for the denoted comparisons.

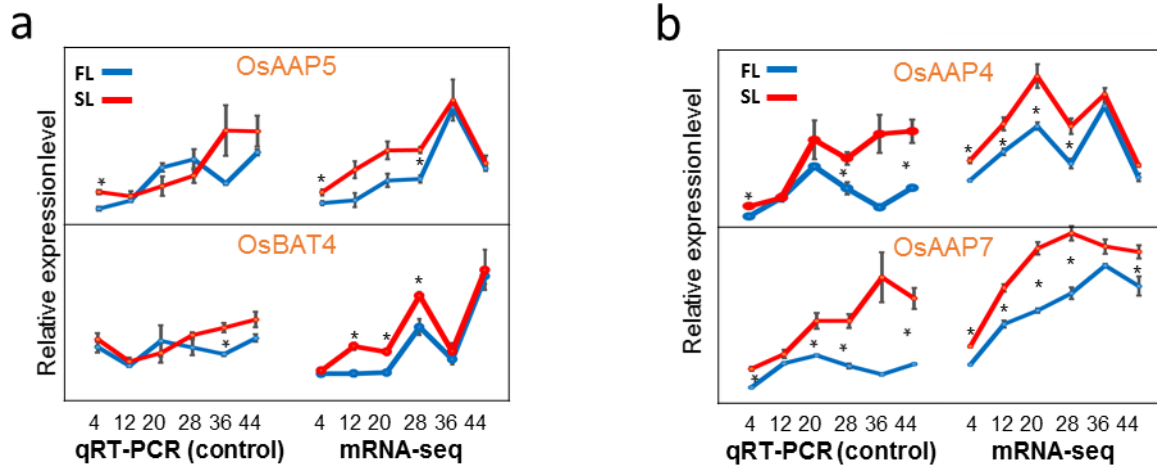

**Supplementary Fig. 5. Comparison of temporal expression profiles in FL and SL from mRNA-sequencing and qRT-PCR analyses of independent samples.** (a-b) qRT-PCR analyses of independent samples ( $n = 3$ ) performed for the denoted AAT genes (“qRT-PCR” panel). Expression levels of AAT genes were normalized to those of actin at corresponding time points. Blue and red lines represent temporal gene expression profiles in FL and SL, respectively. Read counts of the AAT genes from mRNA-sequencing analyses are presented in the same manner (a-b, “mRNA-seq” panel). Data are presented as means  $\pm$  SEM from three biological replicates. \* $P < 0.05$ , two-tailed t-tests for denoted comparisons.

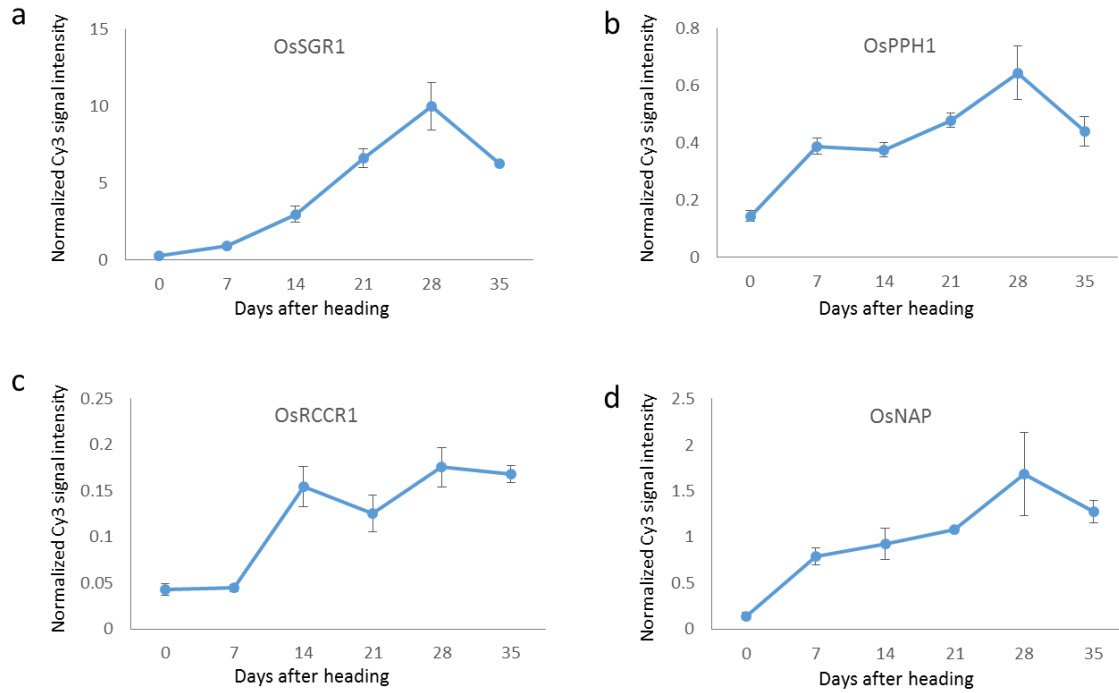

**Supplementary Fig. 6. Temporal expression patterns of genes that are associated with decreased Chl and N contents during grain-filling.** (a-d) Temporal mRNA expression profiles of *OsSGR1* (a), *OsPPH1* (b), and *OsRCCR1* (c) associated with Chl degradation, and those of *OsNAP* (d) associated with N remobilization according to the RiceXpro database; mRNA expression profiles were determined in FL at 0, 7, 14, 21, 28, and 35 DAH.

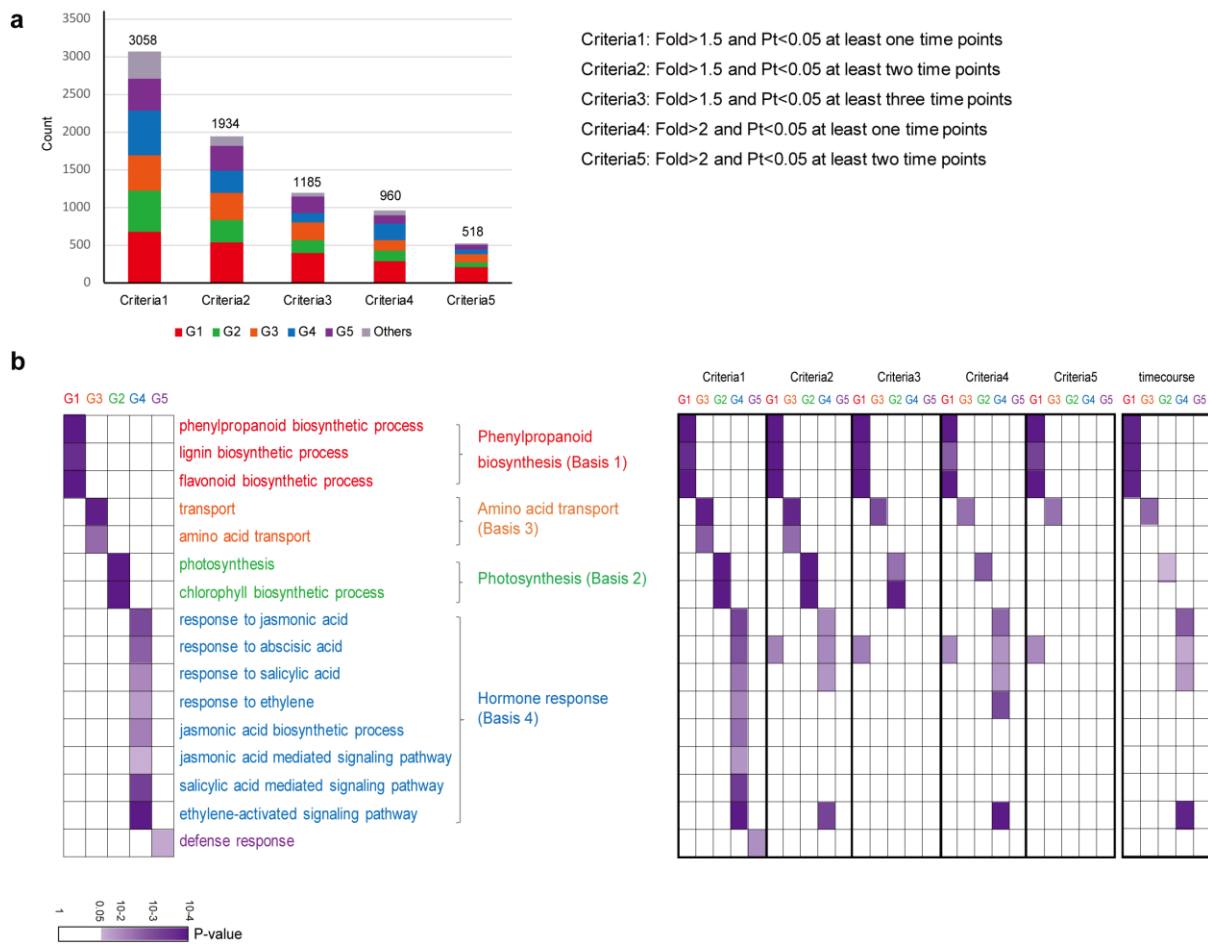

**Supplementary Fig. 7. Diff\_SAGs identified using various criteria and their associated GOBPs.** (a) Numbers of Diff\_SAGs that were identified using the following five criteria: Criteria 1)  $\log_2$ -fold-changes  $\geq 0.58$  and P-value ( $P_i$ )  $< 0.05$  from t-test at one or more of the six time points; Criteria 2)  $\log_2$ -fold-changes  $\geq 0.58$  and P-value  $< 0.05$  at two or more of the six time points; Criteria 3)  $\log_2$ -fold-changes  $\geq 0.58$  and P-value  $< 0.05$  at three or more of the six time points; Criteria 4)  $\log_2$ -fold-changes  $\geq 1$  and P-value  $< 0.05$  at one or more of the six time points; and Criteria 5)  $\log_2$ -fold-changes  $\geq 1$  and P-value  $< 0.05$  at two or more of the six time points. For each of the criteria, the stacked bar graph shows numbers of Diff\_SAGs in the five major groups (G1-5). Total numbers of Diff\_SAGs identified using these criteria are shown above the stacked bar graph. (b) The heat map showing P-values of GOBPs that are enriched by the Diff\_SAGs identified by Criteria 1-5 in each group. The color bar indicates the gradient of  $-\log_{10}(P)$ , where P is the enrichment P-value from the EASE method employed in DAVID software. The timecourse Package was used to identify Diff\_SAGs and their enriched GOBPs using David software (see Discussion). The final heat map shows P-values of GOBPs that were enriched by the Diff\_SAGs identified by the timecourse Package.





**Supplementary Table 1. List of 6365 senescence-associated genes (SAGs).** Gene IDs and descriptions for the SAGs are shown with log<sub>2</sub>-normalized read counts and log<sub>2</sub>-fold-changes (log<sub>2</sub>-FC) at the six time points (DAH 4, 12, 20, 28, 36, and 44). FL and SL columns show whether a gene was identified as a SAG (“SAG”) or not (blank) in FL and SL, respectively. The “Shared/Diff\_SAGs” column indicates whether a gene was classified as Shared\_SAG or Diff\_SAG.

See “Table S1” spreadsheet in the excel file entitled “Supplementary Tables.xlsx”

**Supplementary Table 2. GOBPs represented by Shared\_SAGs in SP1-7.** GOBP term ID, term description, numbers of genes in SP1-7 with the GOBP (Count), and enrichment P-values (P-value) are shown in the table. Highlighted GOBPs in red (Enrichment) with P-values < 0.05 and counts ≥ 5 were considered GOBPs that were enriched by Shared\_SAGs in SP1-7. Highlighted GOBPs in green are shown in Supplementary Fig. 1b.

See “Table S2” spreadsheet in the excel file entitled “Supplementary Tables.xlsx”

**Supplementary Table 3. GOBPs represented by Diff\_SAGs in G1-5** GOBP term ID, term description, numbers of genes in G1-5 with the GOBP (Count), and enrichment P-values (P-value) are shown in the table. Highlighted GOBPs in red (Enrichment) with P-value < 0.05 and counts ≥ 5 were considered GOBPs that were enriched by Diff\_SAGs in G1-5. Highlighted GOBPs in green are shown in Fig. 3c.

See “Table S3” spreadsheet in the excel file entitled “Supplementary Tables.xlsx”

**Supplementary Table 4. Transporters included in G3 and SP1.** Gene ID, TIGR gene ID, the type of molecules transported (Category), and group or pattern to which each transporter belongs (Group) are shown in the table. Reference information for categories of transported molecules were obtained from the TAIR database and are presented in the table with detailed information from “Function”, GOBP, gene ontology molecular function (GOMF), and cellular component (GOCC) in the TAIR database.

See “Table S4” spreadsheet in the excel file entitled “Supplementary Tables.xlsx”

**Supplementary Table 5. List of 26 AAT SAGs Gene ID, TIGR gene ID, gene symbol, and group, or pattern to which it belongs (Group) are shown with AAT family and subfamily for each AAT.**

| Family         | Subfamily | TIGR_ID        | Gene_ID      | Symbol  | Group |
|----------------|-----------|----------------|--------------|---------|-------|
| AAAP           | AAP       | LOC_Os07g04180 | OS07G0134000 | OsAAP1  | SP6   |
|                |           | LOC_Os12g09300 | OS12G0194900 | OsAAP4  | G3    |
|                |           | LOC_Os01g65660 | OS01G0878400 | OsAAP5  | G3    |
|                |           | LOC_Os01g65670 | OS01G0878700 | OsAAP6  | SP3   |
|                |           | LOC_Os05g34980 | OS05G0424000 | OsAAP7  | G3    |
|                |           | LOC_Os01g66010 | OS01G0882800 | OsAAP8  | G3    |
|                |           | LOC_Os04g39489 | OS04G0470700 | OsAAP13 | SP7   |
|                |           | LOC_Os12g08090 | OS12G0181500 | OsAAP16 | SP6   |
|                | ProT      | LOC_Os03g44230 | OS03G0644400 | OsProT2 | G5    |
|                |           | LOC_Os07g01090 | OS07G0100800 | OsProT3 | G5    |
|                | GAT       | LOC_Os05g50920 | OS05G0586500 | OsGAT1  | G1    |
|                | AUX       | LOC_Os01g63770 | OS01G0856500 | OsAUX1  | SP2   |
|                |           | LOC_Os05g37470 | OS05G0447200 | OsAUX2  | SP2   |
|                | ATLa      | LOC_Os02g09810 | OS02G0191300 | OsATL6  | G5    |
|                | ATLb      | LOC_Os11g19240 | OS11G0298000 | OsATL8  | G1    |
|                |           | LOC_Os02g54730 | OS02G0788800 | OsATL9  | G3    |
| LOC_Os04g38680 |           | OS04G0460300   | OsATL13      | SP2     |       |
| APC            | ACT       | LOC_Os01g42234 | OS01G0607200 | OsBAT1  | SP3   |
|                |           | LOC_Os01g71720 | OS01G0945300 | OsBAT4  | G3    |
|                |           | LOC_Os01g71740 | OS01G0945600 | OsBAT5  | SP2   |
|                |           | LOC_Os01g71760 | OS01G0945700 | OsBAT6  | G1    |
|                | CAT       | LOC_Os03g43970 | OS03G0641200 | OsCAT3  | SP3   |
|                |           | LOC_Os03g45170 | OS03G0654400 | OsCAT4  | G3    |
|                |           | LOC_Os12g42850 | OS12G0623500 | OsCAT11 | G5    |
|                | PHS       | LOC_Os02g47210 | OS02G0700500 | OsLAT1  | G5    |
|                |           | LOC_Os01g19850 | OS01G0304100 | OsLAT8  | G3    |

**Supplementary Table 6. List of primer sequences used for qRT-PCR** gGene ID, TIGR gene ID, gene symbol, and forward and reverse primer sequences are shown for each gene.

|            | GeneID       | TIGR_Gene_ID   | Forward Primer             | Reverse Primer            |
|------------|--------------|----------------|----------------------------|---------------------------|
| OsSGR1     | Os09g0532000 | LOC_Os09g36200 | CGCATGCAATGTCGCCAAATG      | GCTCACACACTCATTCCTAAAG    |
| OsPPH1     | Os06g0354700 | LOC_Os06g24730 | ATCAAGGGAGCTGGAATTTGT      | CTTCAAAGCGAACGAAGTTG      |
| OsRCCR1    | Os10g0389200 | LOC_Os10g25030 | GGATCCATGCTCCAACCTCCGCTCG  | AAGCTTCTAGGCCTCTTGTACCCCA |
| OsNAP      | Os03g0327800 | LOC_Os03g21060 | TTGGTGCAACTTTCCAAATAGG     | ATTCGCCATGTGCAATTATGTT    |
| OsAAP5     | Os01G0878400 | LOC_Os01g65660 | CAGGTCGGAACCTTGGAAACAT     | CAAAGGCCGTTGTACAGGTT      |
| OsF5H      | OS01G0227800 | LOC_Os01g12770 | ACCGGAGAAATTCCTCAACAGCAC   | CAAATGGTAGCAGCTCGAAGTCC   |
| OsPAL      | OS04G0518400 | LOC_Os04g43800 | GGGTCATGAACAGCATGATGAACG   | CCGGCATTAAAGAAACCGGATAAGC |
| OsF3'H     | OS10G0320100 | LOC_Os10g17260 | AACGACCTTCTAAGCGTGCTG      | CCGCAGTGAATAGGTTCCAGGAG   |
| OsLhcb1    | OS01G0720500 | LOC_Os01g52240 | TCTCCATGTTCCGGTTCTTC       | CCGGAGATCCACACTCACTT      |
| OsGluTR    | OS10G0502400 | LOC_Os10g35840 | GGACTCGCTGGAGACTGTTC       | CGATCTTCTGGAGGCATTC       |
| OsChlH     | OS03G0323200 | LOC_Os03g20700 | TACTACTCCGCGCAACACTCC      | CCATGCTTCAGCAACAAGCG      |
| OsCAT4     | OS03G0654400 | LOC_Os03g45170 | TTCTTCGCCGATGTTAACA        | CAGAGCTGCTGCACAGAGAC      |
| OsUMAMIT19 | OS10G0210500 | LOC_Os10g14920 | TGAGCTACCATTGTCCACGACTAATG | TGCCTGAAGCTTTCGTTGTCGATG  |
| OsATL9     | OS02G0788800 | LOC_Os02g54730 | TGACACAGACGGTGTCAATGGG     | TGGAGTGAAAGAAGTCCAACACC   |
| OsERF75    | OS01G0797600 | LOC_Os01g58420 | CGTTCGCTTTCCTTCAGAG        | TCGGAGTCACTTTGTGCAAC      |
| OsERF77    | OS04G0610400 | LOC_Os04g52090 | CCCACAAATCCCTCGTAGAA       | TGCACGGGGAGATAGGTATG      |
| OsERF96    | OS10G0562900 | LOC_Os10g41330 | TATTGCTGCTCAGGTGATCG       | TTGCTCTGAGCCTCTGATGTT     |
| OsAAP4     | OS12G0194900 | LOC_Os12g09300 | GCAACATCGCCTTCTCTAC        | AAGACGGTGGTCATGGAGAG      |
| OsAAP5     | OS01G0878400 | LOC_Os01g65660 | CAGGTCGGAACCTTGGAAACAT     | CAAAGGCCGTTGTACAGGTT      |
| OsAAP7     | OS05G0424000 | LOC_Os05g34980 | GTTCAGGCTGACATGGAGGT       | CATCTCCACCGGAAGTAGA       |
| OsBAT4     | OS01G0945300 | LOC_Os01g71720 | CTTGGATCACTGGCTGGTT        | GACGTAGTTGGAGGCCATGT      |
| OsProT2    | OS03G0644400 | LOC_Os03g44230 | GTGGTCAAGAATATGGAGAA       | ATAGCTTGATGTTGAGGACC      |
| OsProT3    | OS07G0100800 | LOC_Os07g01090 | AGGCCAGTCTACCTGCAAGA       | CCCCAGTTGTCAGAACGAAT      |
| OsGAT1     | OS05G0586500 | LOC_Os05g50920 | CAATGCGTTCCTCTCCATT        | AACAACACCACCGTGTAGCA      |
| OsATL8     | OS11G0298000 | LOC_Os11g19240 | ATGGTCGGAATGCTCATAGG       | CCGATGTCTGGTACGTCTT       |
| OsACT1     | OS03G0718100 | LOC_Os03g50885 | GTATCCATGAGACTACATACAACT   | TACTCAGCCTTGGCAATCCACA    |
